# Supplementary material for: Adding Natural Areas to Social Indicators of Intra-Urban Health Inequalities among Children: A Case Study from Berlin, Germany
Source: PubMed Central journal article supplement (PMC4997469; doi:10.3390/ijerph13080783), 2016-08-04
Supplement: ijerph-13-00783-s001.pdf [file ijerph-13-00783-s001.pdf]

# Supplementary Materials: Adding Natural Areas to Social Indicators of Intra-Urban Health Inequalities among Children: A Case Study from Berlin, Germany

Nadja Kabisch , Dagmar Haase and Matilda Annerstedt van den Bosch

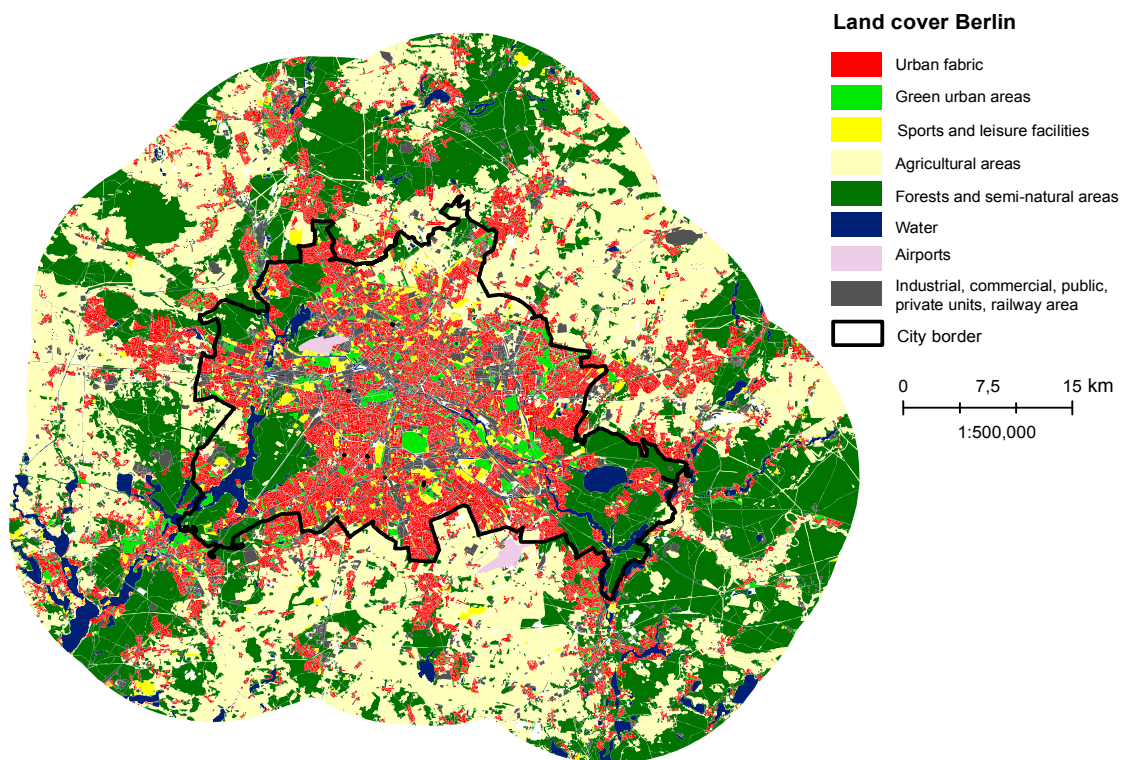

**Figure S1.** Land cover of Berlin's administrative city area and within a 15 km buffer around the city border. Data source: Urban Atlas 2006 [1].

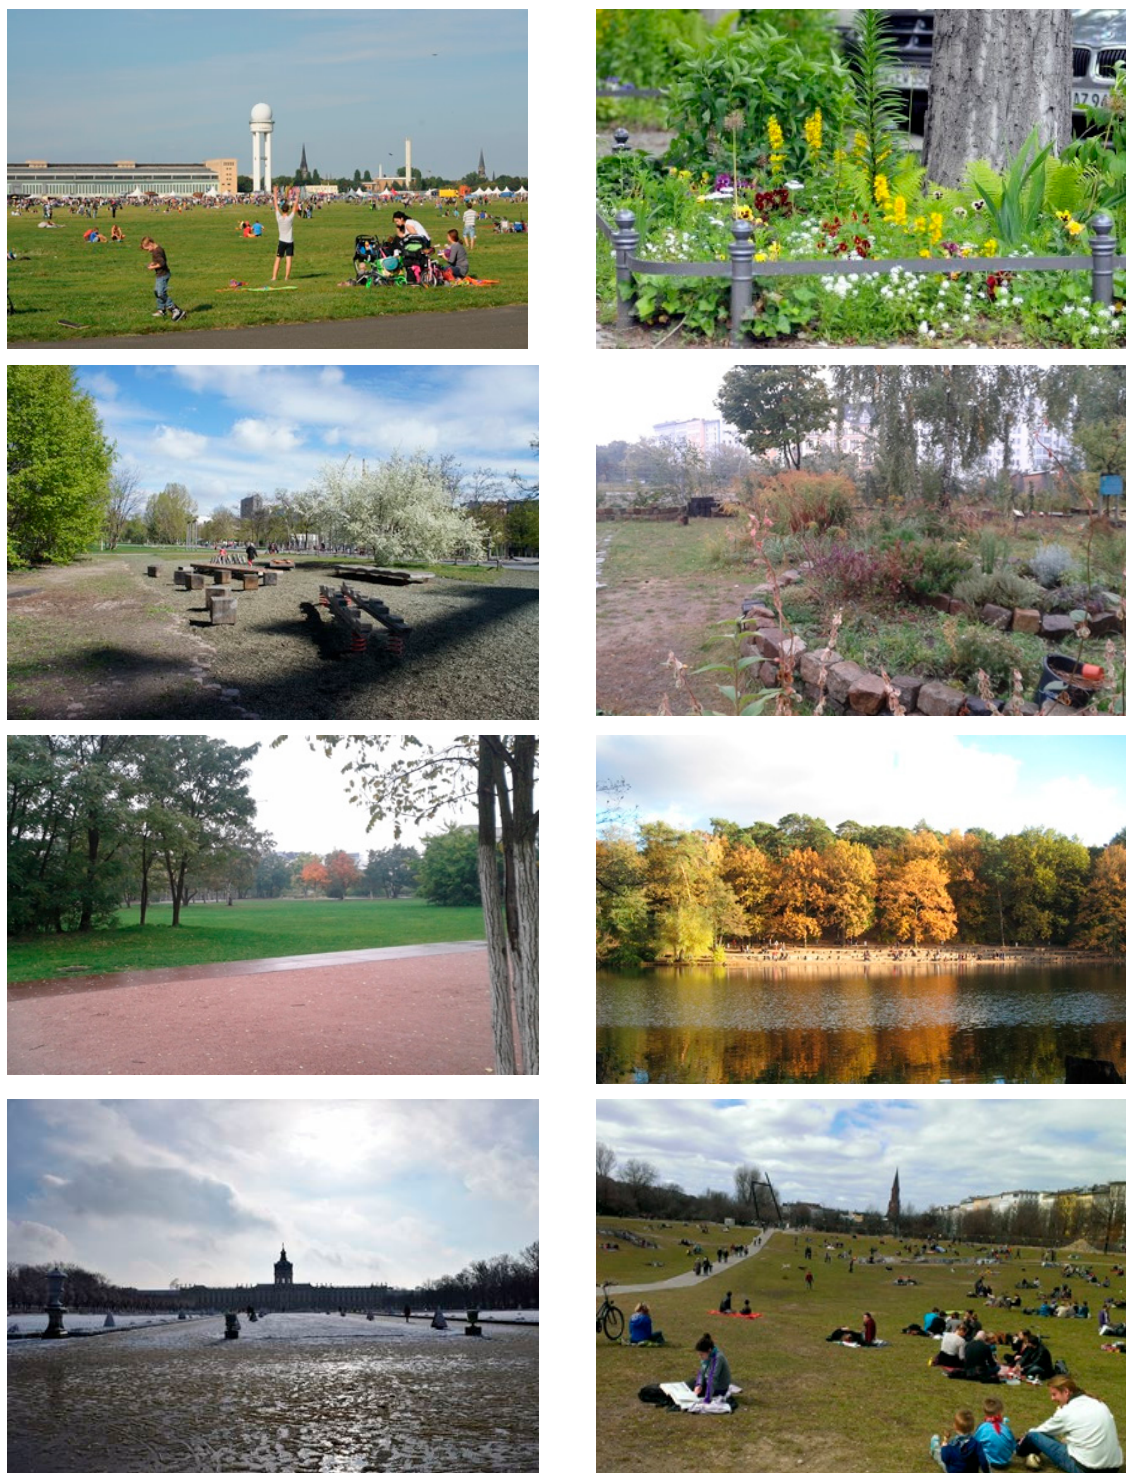

**Figure S2.** Different green spaces in Berlin (from top left to bottom right): The Tempelhofer Feld, the former city airport which closed in 2008 and opened for public use in 2010 is situated only 5 km south of the city centre (Photo by author); tree desk—the area on the ground surrounding trees is planted by local residents all over the city area (Photo by author); the Gleisdreieck park was a former railway brownfield and is now a highly diverse area including parts for recreation, playgrounds for children or urban wilderness areas (Photo by author); the Rosengarten is an intercultural garden in the inner city (Photo by author); another part of the Gleisdreieck with lawns served for recreation (Photo by author); the Grunewald—an urban forest in the south-western part of the city (Photo by N. Larondelle); park around the Castle Charlottenburg—the oldest park in the city; the Görlitzer Park, a former railway area, only three kilometers southeast of the city centre (Photo by N. Larondelle).



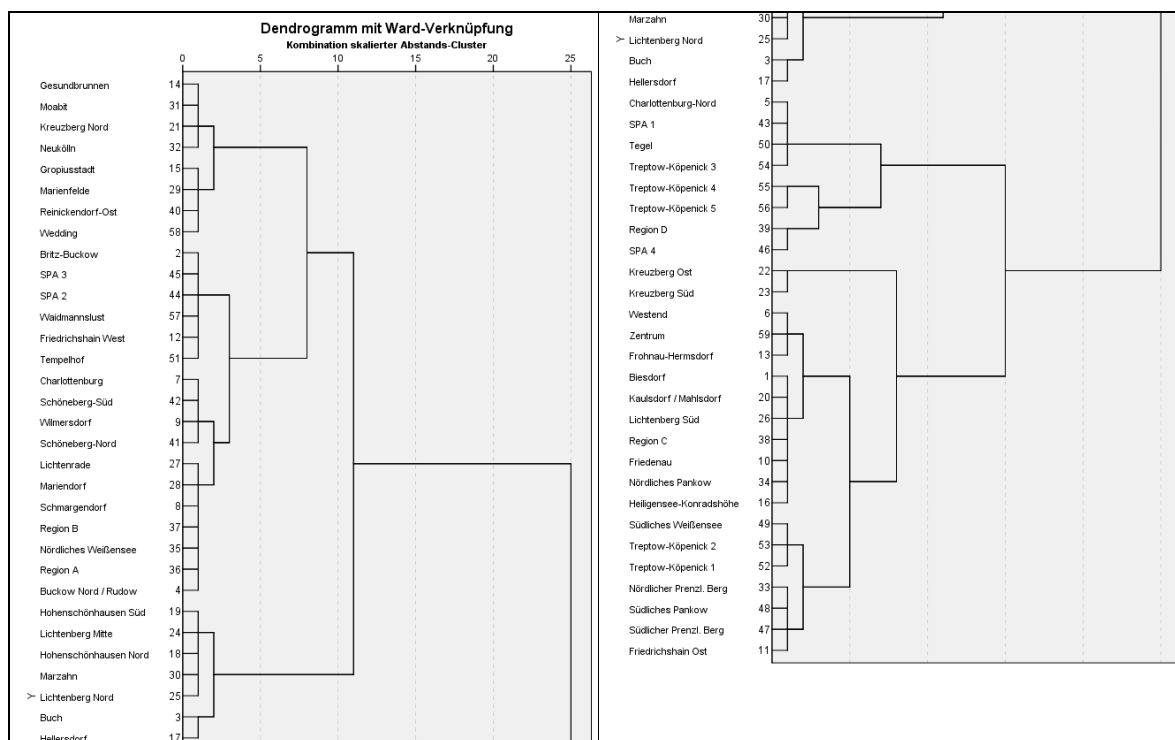

Figure S3. Cluster analysis dendrogram (upper part left, lower part right).

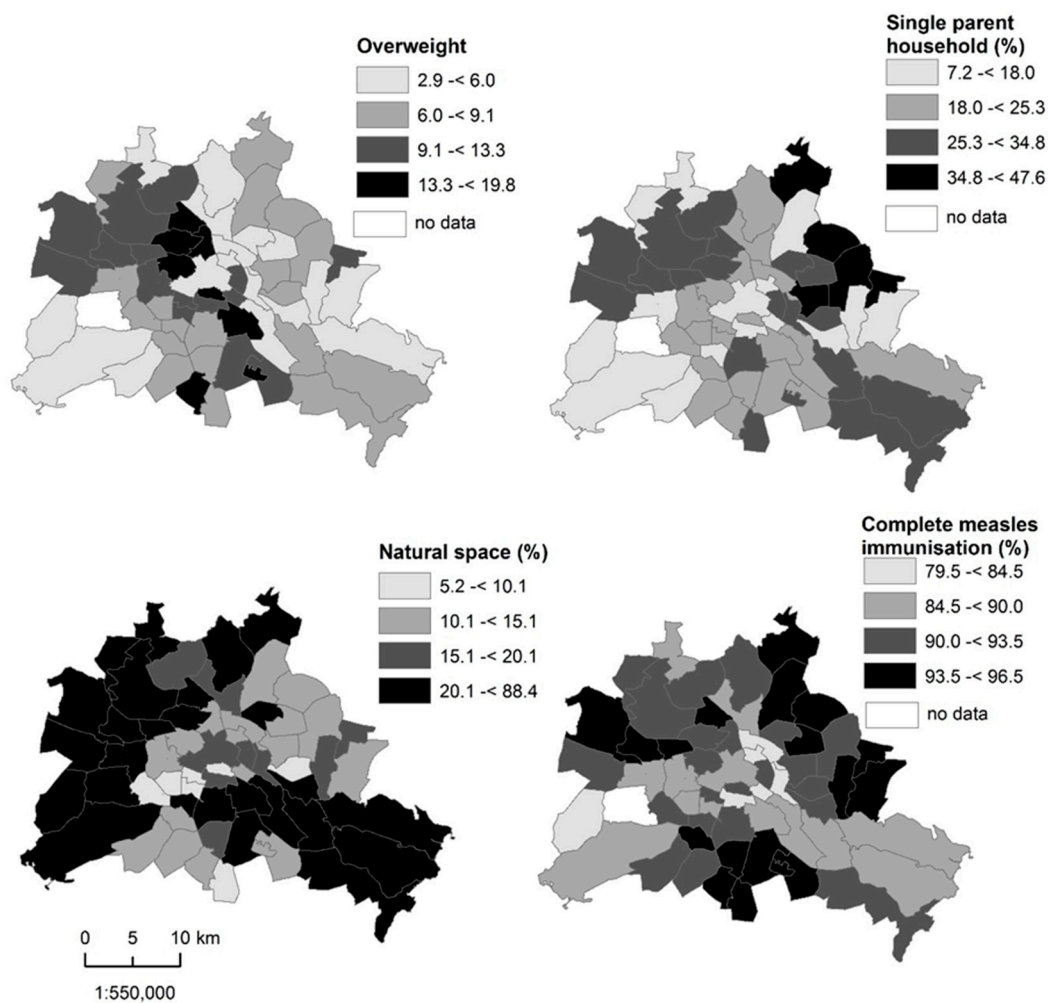

Figure S4. Distribution of the sub-districts according to the cluster variables.

**Table S1.** Agglomeration schedule as SPSS generated result from the hierarchical cluster analysis.

| Stage | Cluster Combined |           | Coefficients | Stage Cluster First Appears |           | Next Stage |
|-------|------------------|-----------|--------------|-----------------------------|-----------|------------|
|       | Cluster 1        | Cluster 2 |              | Cluster 1                   | Cluster 2 |            |
| 1     | 14               | 31        | 0.018        | 0                           | 0         | 21         |
| 2     | 44               | 57        | 0.081        | 0                           | 0         | 3          |
| 3     | 12               | 44        | 0.165        | 0                           | 2         | 24         |
| 4     | 7                | 42        | 0.259        | 0                           | 0         | 9          |
| 5     | 18               | 30        | 0.381        | 0                           | 0         | 31         |
| 6     | 6                | 59        | 0.523        | 0                           | 0         | 19         |
| 7     | 5                | 43        | 0.671        | 0                           | 0         | 29         |
| 8     | 35               | 36        | 0.831        | 0                           | 0         | 20         |
| 9     | 7                | 9         | 0.994        | 4                           | 0         | 28         |
| 10    | 15               | 29        | 1.162        | 0                           | 0         | 34         |
| 11    | 8                | 37        | 1.333        | 0                           | 0         | 27         |
| 12    | 26               | 38        | 1.540        | 0                           | 0         | 26         |
| 13    | 1                | 20        | 1.761        | 0                           | 0         | 43         |
| 14    | 10               | 34        | 2.031        | 0                           | 0         | 26         |
| 15    | 27               | 28        | 2.349        | 0                           | 0         | 39         |
| 16    | 49               | 53        | 2.681        | 0                           | 0         | 32         |
| 17    | 2                | 45        | 3.061        | 0                           | 0         | 37         |
| 18    | 22               | 23        | 3.450        | 0                           | 0         | 54         |
| 19    | 6                | 13        | 3.845        | 6                           | 0         | 46         |
| 20    | 4                | 35        | 4.260        | 0                           | 8         | 27         |
| 21    | 14               | 21        | 4.679        | 1                           | 0         | 38         |
| 22    | 19               | 24        | 5.133        | 0                           | 0         | 40         |
| 23    | 55               | 56        | 5.598        | 0                           | 0         | 51         |
| 24    | 12               | 51        | 6.114        | 3                           | 0         | 37         |
| 25    | 33               | 48        | 6.687        | 0                           | 0         | 33         |
| 26    | 10               | 26        | 7.265        | 14                          | 12        | 36         |
| 27    | 4                | 8         | 7.849        | 20                          | 11        | 39         |
| 28    | 7                | 41        | 8.490        | 9                           | 0         | 48         |
| 29    | 5                | 50        | 9.169        | 7                           | 0         | 35         |
| 30    | 40               | 58        | 9.860        | 0                           | 0         | 34         |
| 31    | 18               | 25        | 10.554       | 5                           | 0         | 40         |
| 32    | 49               | 52        | 11.281       | 16                          | 0         | 49         |
| 33    | 33               | 47        | 12.065       | 25                          | 0         | 41         |
| 34    | 15               | 40        | 13.255       | 10                          | 30        | 47         |
| 35    | 5                | 54        | 14.470       | 29                          | 0         | 53         |
| 36    | 10               | 16        | 15.686       | 26                          | 0         | 43         |
| 37    | 2                | 12        | 16.949       | 17                          | 24        | 50         |
| 38    | 14               | 32        | 18.253       | 21                          | 0         | 47         |
| 39    | 4                | 27        | 19.561       | 27                          | 15        | 48         |
| 40    | 18               | 19        | 21.123       | 31                          | 22        | 45         |
| 41    | 11               | 33        | 22.739       | 0                           | 33        | 49         |
| 42    | 3                | 17        | 24.477       | 0                           | 0         | 45         |
| 43    | 1                | 10        | 26.389       | 13                          | 36        | 46         |
| 44    | 39               | 46        | 28.541       | 0                           | 0         | 51         |
| 45    | 3                | 18        | 31.766       | 42                          | 40        | 56         |
| 46    | 1                | 6         | 35.005       | 43                          | 19        | 52         |
| 47    | 14               | 15        | 38.580       | 38                          | 34        | 55         |
| 48    | 4                | 7         | 42.305       | 39                          | 28        | 50         |
| 49    | 11               | 49        | 46.797       | 41                          | 32        | 52         |
| 50    | 2                | 4         | 51.829       | 37                          | 48        | 55         |
| 51    | 39               | 55        | 58.178       | 44                          | 23        | 53         |
| 52    | 1                | 11        | 69.472       | 46                          | 49        | 54         |
| 53    | 5                | 39        | 84.865       | 35                          | 51        | 57         |
| 54    | 1                | 22        | 101.043      | 52                          | 18        | 57         |
| 55    | 2                | 14        | 118.758      | 50                          | 47        | 56         |
| 56    | 2                | 3         | 142.836      | 55                          | 45        | 58         |
| 57    | 1                | 5         | 174.954      | 54                          | 53        | 58         |
| 58    | 1                | 2         | 232.000      | 57                          | 56        | 0          |

**Table S2.** Outputs of hierarchical multivariate regression models on influencing factors of children overweight (%).

|                 | $\beta_1$<br>(Social Index) | $\beta_2$ (Non-German %) | $\beta_3$ (Single Parent Household %) | $\beta_4$ (Kindergarten Attendance %) | $\beta_5$ (Natural Area %) | $\beta_6$ (Access Natural Area %) | $\beta_7$ (Per Capita Natural Area %) | R <sup>2</sup> -Adjusted (%) |
|-----------------|-----------------------------|--------------------------|---------------------------------------|---------------------------------------|----------------------------|-----------------------------------|---------------------------------------|------------------------------|
| Model 1         | <b>-0.46</b>                | <b>0.50</b>              | -0.01                                 | -0.06                                 |                            |                                   |                                       | 84.6                         |
| <i>p</i> values | 0.000                       | 0.000                    | 0.908                                 | 0.534                                 |                            |                                   |                                       |                              |
| Model 2         | <b>-0.46</b>                | <b>0.51</b>              | 0.00                                  | -0.09                                 | -0.15                      | -0.05                             | 0.18                                  | 84.8                         |
| <i>p</i> values | 0.000                       | 0.000                    | 0.984                                 | 0.358                                 | 0.154                      | 0.431                             | 0.111                                 |                              |

Note: Significant coefficients in bold.

**Table S3.** Outputs (Beta and *p*-values) of hierarchical multivariate regression models on influencing factors of children deficit in viso-motoric development (%).

|                 | $\beta_1$<br>(Social Index) | $\beta_2$ (Non-German %) | $\beta_3$ (Single Parent Household %) | $\beta_4$ (Kindergarten Attendance %) | $\beta_5$ (Natural Area %) | $\beta_6$ (Access Natural Area %) | $\beta_7$ (Per Capita Natural Area %) | R <sup>2</sup> -Adjusted (%) |
|-----------------|-----------------------------|--------------------------|---------------------------------------|---------------------------------------|----------------------------|-----------------------------------|---------------------------------------|------------------------------|
| Model 1         | <b>-0.46</b>                | <b>-0.27</b>             | 0.18                                  | <b>-0.36</b>                          |                            |                                   |                                       | 46.9                         |
| <i>p</i> values | 0.009                       | 0.093                    | 0.128                                 | 0.043                                 |                            |                                   |                                       |                              |
| Model 2         | <b>-0.42</b>                | -0.18                    | <b>0.20</b>                           | <b>-0.35</b>                          | <b>-0.81</b>               | 0.11                              | <b>0.61</b>                           | 62.5 *                       |
| <i>p</i> values | 0.009                       | 0.241                    | 0.047                                 | 0.026                                 | 0.000                      | 0.272                             | 0.001                                 |                              |

Note: Significant coefficients in bold. \* Change in R<sup>2</sup> is significant at 0.05.

**Table S4.** Outputs (Beta and *p*-values) of hierarchical multivariate regression models on influencing factors of children deficit in language development (%).

|                 | $\beta_1$<br>(Social Index) | $\beta_2$ (Non-German %) | $\beta_3$ (Single Parent Household %) | $\beta_4$ (Kindergarten Attendance %) | $\beta_5$ (Natural Area %) | $\beta_6$ (Access Natural Area %) | $\beta_7$ (Per Capita Natural Area %) | R <sup>2</sup> -Adjusted (%) |
|-----------------|-----------------------------|--------------------------|---------------------------------------|---------------------------------------|----------------------------|-----------------------------------|---------------------------------------|------------------------------|
| Model 1         | <b>-0.435</b>               | <b>0.309</b>             | 0.027                                 | <b>-0.291</b>                         |                            |                                   |                                       | 89.0                         |
| <i>p</i> values | 0.000                       | 0.000                    | 0.611                                 | 0.001                                 |                            |                                   |                                       |                              |
| Model 2         | <b>-0.443</b>               | <b>0.310</b>             | 0.030                                 | <b>-0.280</b>                         | <b>-0.301</b>              | 0.027                             | <b>0.175</b>                          | 91.7 *                       |
| <i>p</i> values | 0.000                       | 0.000                    | 0.513                                 | 0.000                                 | 0.000                      | 0.563                             | 0.035                                 |                              |

Note: Significant coefficients in bold. \* Change in R<sup>2</sup> is significant at 0.05.

## References

1. EEA. Urban Atlas 2006. Available online: <http://www.eea.europa.eu/data-and-maps/data/urban-atlas> (accessed on 11 July 2012).

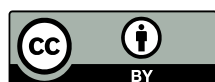

© 2016 by the authors; licensee MDPI, Basel, Switzerland. This article is an open access article distributed under the terms and conditions of the Creative Commons by Attribution (CC-BY) license (<http://creativecommons.org/licenses/by/4.0/>).
